# Supplementary material
Source: PubMed Central journal article supplement (PMC2570726)
Supplement: tpc.107.057836_1.pdf [file tpc.107.057836_1.pdf]

**Supplemental Figure 1.** Physical Map of the *Volvox RBR1* cDNA (Splice Variant 1) and Overlapping Fragments Used to Assemble the Complete Sequence.

Fragments obtained by RT-PCR or from an EST library are indicated. ATG, translation start site; asterisk (\*), translation stop site; thick horizontal bar, open reading frame; thinner horizontal bar, 5'- and 3'-UTRs; AAA, poly A tail; arrowheads, positions of introns.

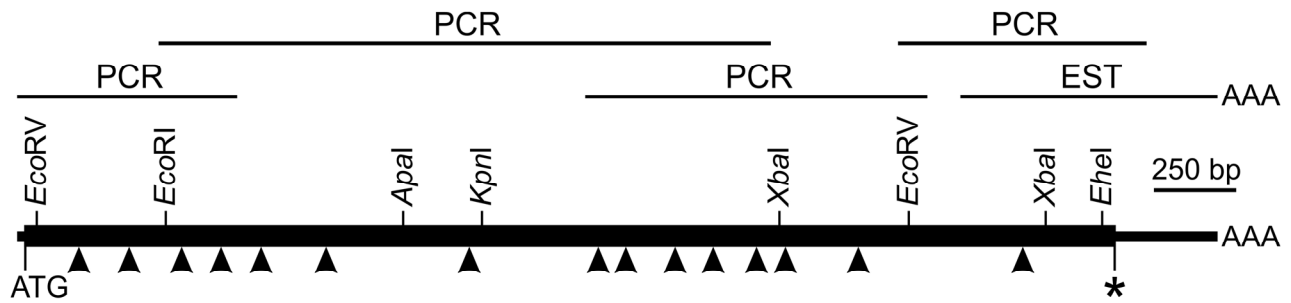









**Supplemental Figure 4. Amino Acid Sequence Alignment of *Volvox* RBR1 and *Chlamydomonas* MAT3.**

BLASTp result (basic local alignment search tool, protein) using the National Center for Biotechnology Information (NCBI) databases. Numbers on both sides of the sequence alignment correspond to amino acid residue numbering of *Volvox* RBR1 and *Chlamydomonas* MAT3. Identical and similar (“+”) amino acid residues are given between the sequences.

Identities: 381 of 639 residues (59%), similarities: 471 of 639 residues (73%), gaps: 25 of 639 residues (3%).

|             |     |                                                                  |     |
|-------------|-----|------------------------------------------------------------------|-----|
| <b>RBR1</b> | 17  | LLKEVNFQDAIS-QEGFLQLYRELRASYECQENASPASDYAGEQDEEVKHLCTQASLLFV     | 75  |
|             |     | L+K + G+ + Q L+LY EL+ +YE QE A+P +YAG+QDE+VK C QASLLFV           |     |
| <b>MAT3</b> | 14  | LIKGLTIGNVPALQPDVLELYAELKGA YE AQERAAP-REYAGDQDEDEVKQACKQASLLFV  | 72  |
| <b>RBR1</b> | 76  | ARVLF AAQAQ---GGRT-VSNFGCPISRIVAAAGINLLDFFREVN VVVSKLSSYFEARGG   | 131 |
|             |     | ARVL AAQ + G T SN G ISRIVA AGINLLDFFREV+VVVS+LS+YFE+RG           |     |
| <b>MAT3</b> | 73  | ARVLSAAQKKEKDGSETQPSNLGLSISRIVAVAGINLLDFFREVVHVVSSELSAYFESRGS    | 132 |
| <b>RBR1</b> | 132 | SSRLFAQQAQLKENSETVVVMGLLAKKYKDNFGMLLHQLDFFKQIVLKLGNWAFVLVRIK     | 191 |
|             |     | SS+ F+QQA LKENSETVVVMGLLAKKYKDNF LHQLDF+KQ+VL+LGW+AFVLVLR+K      |     |
| <b>MAT3</b> | 133 | SSKQFSQQALLKENSETVVVMGLLAKKYKDNFNTFLHQLDYFKQVVLRLGWSAFVLVLRVK    | 192 |
| <b>RBR1</b> | 192 | LLSSFPD VVSCVELLPCVFAILVSHAPQLPDCLSHVSGAEYRSALLKSLSEICKADYSRV    | 251 |
|             |     | LLS+FPD VVSCVELLPC+FAIL SHAP+LPDCL+H++ + LLKS+++ CKADY RV        |     |
| <b>MAT3</b> | 193 | LLSAFPD VVSCVELLPCIFAILASHAPRLPDC LTHITREDRGKFL LKSMADTCKADYGRV  | 252 |
| <b>RBR1</b> | 252 | QARIPSVEALLSHVLTSAVPEWREAAASHAQLESNLAKSATAAEKCTFPGVVDLVSSRLE     | 311 |
|             |     | QAR+PSVEALL+ V TSAVPEWR A + A+ AK+ + A G VDLV+S +LE              |     |
| <b>MAT3</b> | 253 | QARMP SVEALLTQVFTSAVPEWRTAVAEAK-----AKALSDASGPAAVGGVDLVASPVLE    | 307 |
| <b>RBR1</b> | 312 | GLVTDGNRMQRALSALETEYAQHYTRGGSELDEREFLFTDFTKFASPRFSPRHMQS AVMK    | 371 |
|             |     | GLVTD +RM R ++ALE EY QHY+RG +ELDEREFL TDFTKFASPRFSP HM S + K     |     |
| <b>MAT3</b> | 308 | GLVTD TDRMNRVVAALEREYEQHYSRGATELDEREFLSTDFTKFASPRFSPGHMHS TMAK   | 367 |
| <b>RBR1</b> | 372 | LRAGPLPIRQGSLLGPGAHTTASYAIS PSSMNPKTSLLA--RMHSPLPKNLGVETGPPV     | 429 |
|             |     | LR+G +P+R G LGPG HT +P+ P+ L +HSPLP ++L G P                      |     |
| <b>MAT3</b> | 368 | LRSGSMPLRS GGPLGPGLHTA-----TPAHPGPQQ LHLVPLGLHSP LPMHNLNAGPGVPG  | 422 |
| <b>RBR1</b> | 430 | TPVSEIMSTSAWLRGITASLAAEPSVSMRYLAEVAVPPDGEQGACVTVTLSAAEQLNQR      | 489 |
|             |     | TP+SE M SAWLRG+T+++ AEPSP++ R+LA A+P + V +QL +R                  |     |
| <b>MAT3</b> | 423 | TPISEAMGASAWLRGVTSNMVAEPSPTLQRFLA--ALPINSNSSGPTPV-----QQLMKR     | 475 |
| <b>RBR1</b> | 490 | VQELVSCIMPEEKIPSLGSPFLQPSLVSERRIEVTKVYYLSLERILQAEKNNGVAGV        | 549 |
|             |     | V++LV+ ++P+E PSLLG FPLL SL ERRIE TK+Y SL+ ILQ E++ NG+            |     |
| <b>MAT3</b> | 476 | VRDLVASVIPDEAAPSLLGPFPLLNTSLGVERRIEATKLYCHSLDTILQNEQRTNGLPAA     | 535 |
| <b>RBR1</b> | 550 | TSLLSAGKFHRALVACSAE VVTACYRMVSC TFPKVL DALHIKAFDLAKMIQC FVRSITTL | 609 |
|             |     | +LL + KF R L+AC EVV ACYRMVSC FP VLDAL IKAFD+A +I FV+SI TL        |     |
| <b>MAT3</b> | 536 | LALLGSAKFQRGLIACCIEVVAACYRMVSCAFP NVLDALRIKAFDMANIIGTFVKS IATL   | 595 |
| <b>RBR1</b> | 610 | PRDLKRHLFLVEEKILESLAWEADSPLYSLICSTVAQDE                          | 648 |
|             |     | PR+LKRHLFL+EEKILE LAWE S LY LI + ++E                             |     |
| <b>MAT3</b> | 596 | PRELKRHLFLIEEKILECLAWEPGSSLYHLIVNVHTENE                          | 634 |

Identities: 116 of 194 residues (59%), similarities: 142 of 194 residues (73%),  
gaps: 3 of 194 residues (1%).

|             |     |                           |                       |                     |                  |               |
|-------------|-----|---------------------------|-----------------------|---------------------|------------------|---------------|
| <b>RBR1</b> | 695 | FSPVKKAR-MEGSQHAVHRYLRKLP | CIGAKFVESAH           | TDGCAAALNHFCCKVLKLA | FRL              | 753           |
|             |     | SP KKAR +G H+ Y+ LP +G    | + G A L F             | KVLKL +FRL          |                  |               |
| <b>MAT3</b> | 772 | MSPAKKARGTDGGAHSTQSYIESL  | PNAVGF                | P-PAAGAAQ           | QAGLLFEFLRKVLKLS | FRL 830       |
| <b>RBR1</b> | 754 | AVLCDNFDFSP               | LQRLDVNTKVYQTIEHALFFQ | THLFYNRHIDQI        | IILSALYGFC       | KVHRLAQ 813   |
|             |     | A+LC+NFDFSP               | +VN+KVY+ IEHAL+ Q     | THLFYNRHIDQI+LS     | LYG+CKVH+L+Q     |               |
| <b>MAT3</b> | 831 | ALLCENFDFSP               | LEGPEVNSKVYE          | IEHALYKQ            | THLFYNRHIDQIM    | LSTLYGYCKVHKL |
| <b>RBR1</b> | 814 | VSFREIIAHYRKQP            | QAQPSIFRSVVVEQSNP     | SLQVGR              | RADIIAFYNQ       | VFVPCMKS      |
|             |     | VSFREIIA YRKQP            | QAQ SIFRSVV++Q P+LQ+  | RADII FYN VFVP      | M++FLL+S         |               |
| <b>MAT3</b> | 891 | VSFREIIAQYRKQP            | QAQPSIFRSVVIDQ        | VLP                 | TLQISRADII       | GFYNAV        |
| <b>RBR1</b> | 874 | GKGEYPGTIGPTIG            | 887                   |                     |                  |               |
|             |     | + G GP +G                 |                       |                     |                  |               |
| <b>MAT3</b> | 951 | -ESNGSGASGP               | PLG                   | 963                 |                  |               |

Identities: 41 of 111 residues (36%), similarities: 56 of 111 residues (50%),  
gaps: 13 of 111 residues (11%).

|             |      |                     |                      |               |              |               |
|-------------|------|---------------------|----------------------|---------------|--------------|---------------|
| <b>RBR1</b> | 1002 | EHQIPDGLAALLQALDS   | QQGGADNCGTESQQYCEVGS | RNLNAGPGWVLR  | PVGLDGGPKSCT | 1061          |
|             |      | EH+IP+GLAALLQALDSQ+ | +N E ++ EV +         | V R           | T            |               |
| <b>MAT3</b> | 1107 | EHKIPEGLAALLQALDS   | QKAAEENTAE           | EEEEEEVDADEEQ | PQARVTR----- | SGRT 1158     |
| <b>RBR1</b> | 1062 | GLDQSFNGQAACAGLDV   | FDDAD--TYDCSQFQKTC   | ---RRQRT      | PNRKHGSD     | 1107          |
|             |      | D+S + + DD D + D    | Q+T                  | RRQRT         | PNR++G+D     |               |
| <b>MAT3</b> | 1159 | ARDRSTGRERRGRHTE    | ARDMD                | EASMDAEFS     | QQT          | VVTGRRQRT     |
|             |      |                     |                      |               |              | PNRRYGAD 1209 |

**Supplemental Figure 5.** Expression Level of *RBR1* Splice Variants in Female *Vo/vox* Relative to the Background Noise Obtained in Real-Time PCR Experiments with Male *Vo/vox*.

The expression level (prior to embryogenesis) of the four *RBR1* splice variants (var1 to var4) in female *Vo/vox* was compared to the background noise obtained in real-time PCR experiments with male 281-1. Error bars refer to the standard deviation (S.D.) of the y-value. All real-time RT-PCR experiments were carried out in triplicate from technical repeats.

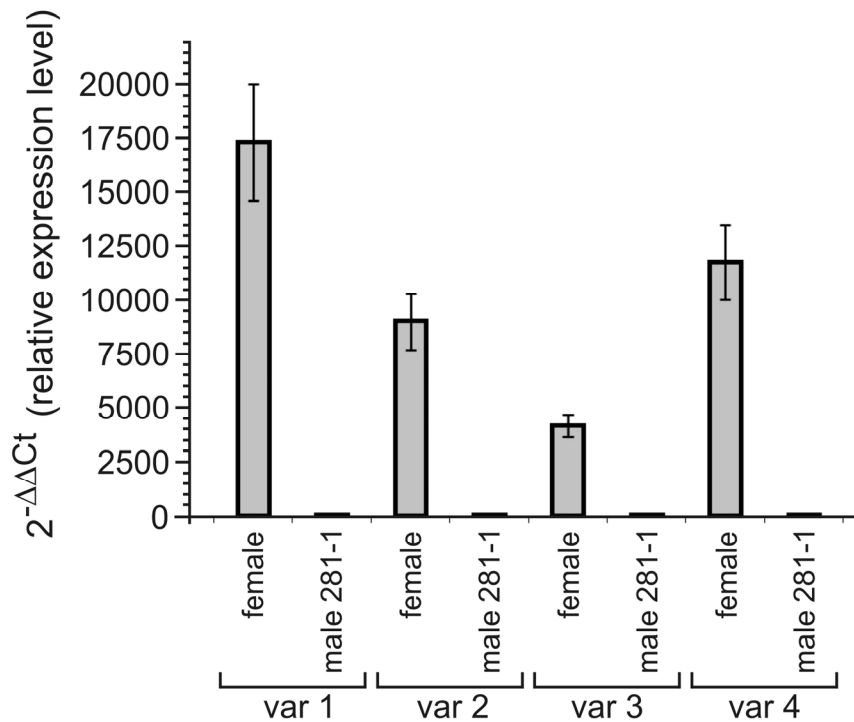



**Supplemental Figure 6.** Localization of PCR Primers and DNA Gel Blot Probes within the *RBR1* Gene Used to Confirm the Absence of the *RBR1* Gene in Males.

The localization of sequences coding for N1-N3 domains as well as A and B domains are indicated within the physical map of exon and intron segments in the *Volvox RBR1* gene (splice variant 1). Standard PCR primers are given in green and degenerate PCR primers are given in red. Horizontal bars indicate the relative position of the primers given above the bars. Probes for DNA gel blot analyses are indicated in blue. The length of each probe is indicated in bp. ATG, translation start site; asterisk (\*), translation stop site; thick horizontal bars, exons; numbers above exons, numbering of exons; thinner horizontal bars, introns and 5'- and 3'-UTRs; thinnest horizontal bars, upstream and downstream sequences.

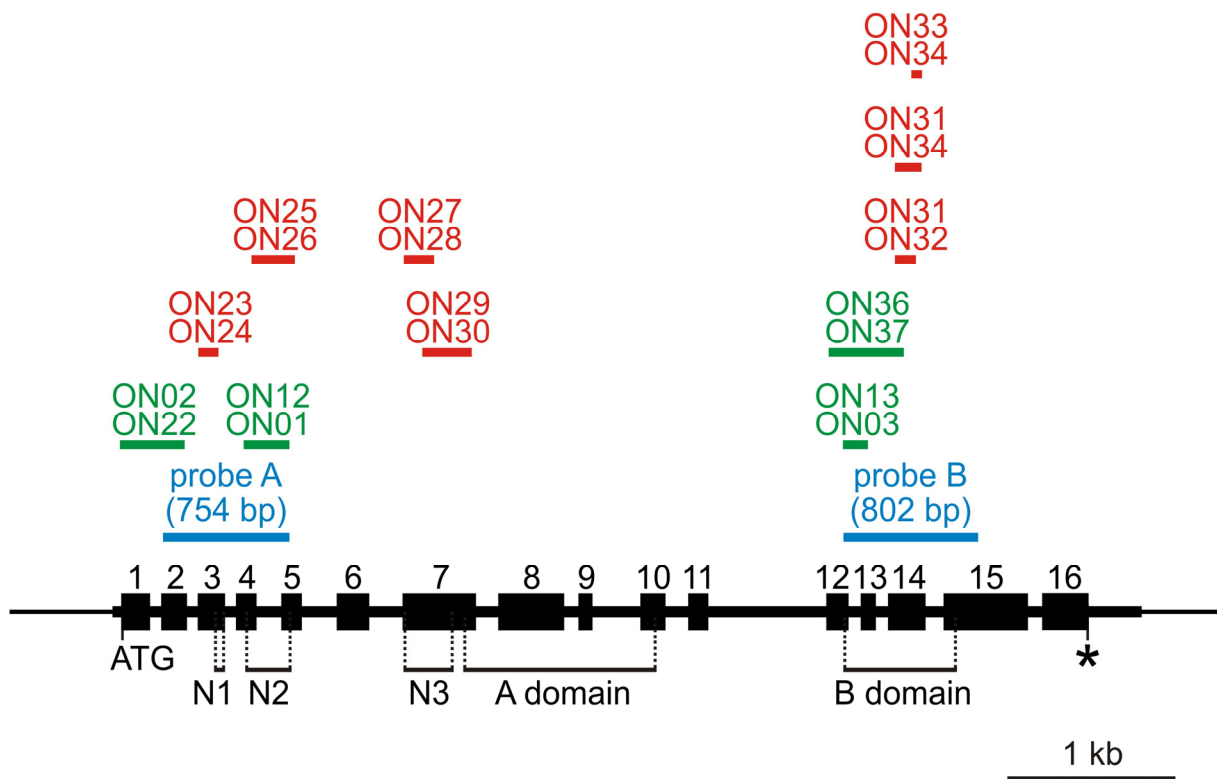

**Supplemental Figure 7.** Presence of *RBR1* in Male Transformants: PCR Results with *RBR1*-Specific Primers.

Genomic DNA of the males TRef1, T175-6-1, T175-3-2 and T175-4-6 was analyzed by PCR using *RBR1*-specific primers (sequences presented in Supplemental Table 2 online). TRef1 is a transgenic male descendant of 281-1 that has been transformed only with the *nitA* selectable marker gene, and transformants T175-6-1, T175-3-2 and T175-4-6 are descendants of 281-1 that have been transformed with both the *nitA* gene and the female *RBR1* gene.

The expected sizes of *RBR1* fragments were as follows:

**(A)** 274 bp (primers ON12 and ON01).

**(B)** 449 bp (primers ON36 and ON37).

The localization of PCR primers is indicated on the map of the *RBR1* gene in Supplemental Figure 6 online.

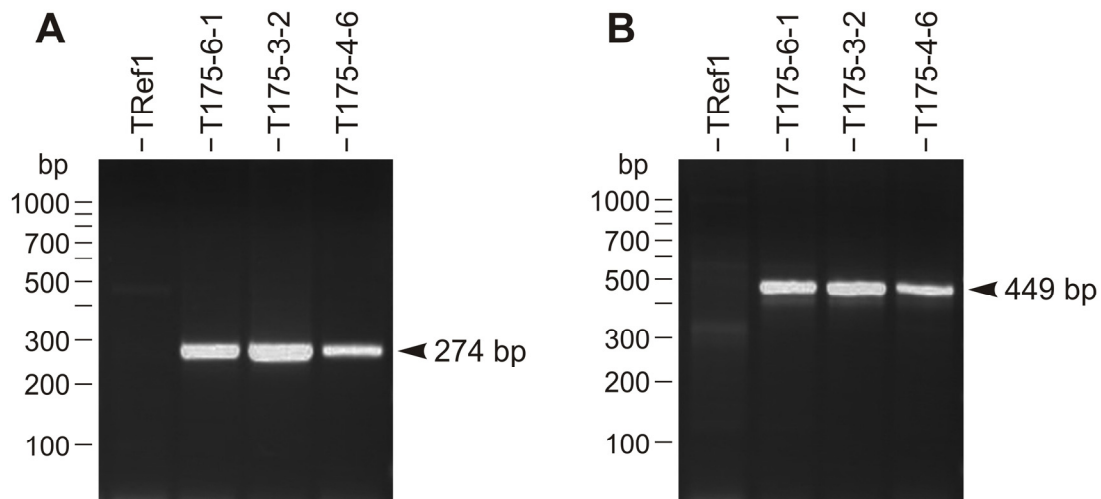

**Supplemental Table 1.** Sequence Comparison of Putative Orthologs Identified Both at the Mating Type Locus of *C. reinhardtii* and on a Small Genomic Fragment of the Female *V. carteri* Genome (Scaffold 43) that Contains the *RBR1* Gene.

| Number<br>(As<br>given in<br>the<br>text) | Gene product / Protein                                | Protein ID<br><i>V. carteri</i> | Protein ID<br><i>C. reinhardtii</i> | Percent identity<br>(Number of<br>identical amino<br>acid residues / total<br>number of<br>residues) | Percent similarity<br>(Number of similar<br>amino acid<br>residues / total<br>number of<br>residues) |
|-------------------------------------------|-------------------------------------------------------|---------------------------------|-------------------------------------|------------------------------------------------------------------------------------------------------|------------------------------------------------------------------------------------------------------|
| 1                                         | Spermine synthase                                     | 76291                           | 206416                              | 76.36%<br>(239/313)                                                                                  | 87.54%<br>(274/313)                                                                                  |
| 2                                         | Protein of unknown<br>function                        | 127490                          | 182394                              | 76.33%<br>(129/169)                                                                                  | 83.43%<br>(141/169)                                                                                  |
| 3                                         | Predicted Na <sup>+</sup> -dependent<br>cotransporter | 82799                           | 112377                              | 78.88%<br>(239/303)                                                                                  | 88.45%<br>(268/303)                                                                                  |
| 4                                         | AMP-activated protein<br>kinase                       | 82801                           | 112765                              | 83.40%<br>(216/259)                                                                                  | 91.12%<br>(236/259)                                                                                  |
| 5                                         | N-myristoyl transferase                               | 106391                          | 97790                               | 78.06%<br>(306/392)                                                                                  | 85.97%<br>(337/392)                                                                                  |
| 6                                         | Splicing factor 3a,<br>subunit 2                      | 106397                          | 196072                              | 73.87%<br>(212/287)                                                                                  | 79.09%<br>(227/287)                                                                                  |
| 7                                         | Vacuolar ATP synthase,<br>subunit C                   | 106399                          | 187322                              | 73.99%<br>(276/373)                                                                                  | 87.94%<br>(328/373)                                                                                  |
| 8                                         | Cytoplasmic dynein 1b<br>heavy chain                  | 64869                           | 24009                               | 86.61%<br>(3765/4347)                                                                                | 92.96%<br>(4041/4347)                                                                                |
| 9                                         | Hydroxyproline-rich<br>glycoprotein                   | 118743                          | 195937                              | 34.63%<br>(160/462)                                                                                  | 44.59%<br>(206/462)                                                                                  |
| 10                                        | Retinoblastoma-related<br>protein RBR1/MAT3           | 127148                          | 187248                              | 45.99%<br>(566/1231)                                                                                 | 61.1%<br>(752/1231)                                                                                  |
| 11                                        | Predicted sugar kinase                                | 82819                           | 126745                              | 88.37%<br>(304/344)                                                                                  | 93.02%<br>(320/344)                                                                                  |

Protein IDs are as given in the sequence databases maintained by the DOE Joint Genome Institute. See JGI *C. reinhardtii* genome portal 3.0 (<http://genome.jgi-psf.org/Chlre3/Chlre3.home.html>) and JGI *V. carteri* genome portal 1.0 (<http://genome.jgi-psf.org/Volca1/Volca1.home.html>).

**Supplemental Table 2.** Oligonucleotide Primers.

| Primer name | Primer sequence           | Comment                                  |
|-------------|---------------------------|------------------------------------------|
| ON01        | 5'-CGTGACTAACGAGGATGGC    | <i>RBR1</i> , 19-mer                     |
| ON02        | 5'-GTATGTGTTTCGCTCGACGG   | <i>RBR1</i> , 20-mer                     |
| ON03        | 5'-ATCGCATAAGACCGCAAGCC   | <i>RBR1</i> , 20-mer                     |
| ON04        | 5'-CGCAGCAGGCTCAGCTGAAG   | <i>RBR1</i> , 20-mer                     |
| ON05        | 5'-ATGAGCTGCTGACAGTTCGC   | <i>RBR1</i> , 20-mer                     |
| ON06        | 5'-TGA CTGCATGCTATCGCATG  | <i>RBR1</i> , 20-mer                     |
| ON07        | 5'-TTGGTTACCGTCCTCGGTTC   | <i>RBR1</i> , 20-mer                     |
| ON08        | 5'-AGCCCTGACAATGTTACTGG   | <i>RBR1</i> , 20-mer                     |
| ON09        | 5'-CGTCCTTCATATGCTCGAAG   | <i>RBR1</i> , 20-mer                     |
| ON10        | 5'-GACGAAGCATTGTATCATCTTG | <i>RBR1</i> , 22-mer                     |
| ON11        | 5'-TAGAGATTAACCGACCTAACG  | <i>RBR1</i> , 21-mer                     |
| ON12        | 5'-GCAGATAGTGCTTAAGCTTGG  | <i>RBR1</i> , 21-mer                     |
| ON13        | 5'-CGGCAGCATTAAACCATTTCTG | <i>RBR1</i> , 22-mer                     |
| ON14        | 5'-CGATGGTCTGATACACCTTTGT | <i>RBR1</i> , 22-mer                     |
| ON15        | 5'-AACCTGGGCCAGCCTTTGT    | <i>RBR1</i> , 19-mer                     |
| ON16        | 5'-CTGTGGCGAAGCAGTCAAATC  | <i>RBR1</i> , 21-mer                     |
| ON17        | 5'-CTGCGCAAACAATCGCGAAC   | <i>RBR1</i> , 20-mer                     |
| ON18        | 5'-CTGCTGCGGGCATTAAATCTTC | <i>RBR1</i> , 21-mer                     |
| ON19        | 5'-GATTGACCCGAAAGATAGCAGG | <i>RBR1</i> , 22-mer                     |
| ON20        | 5'-TGAGAAGACGTACGAGCTGC   | $\beta$ -actin, 20-mer                   |
| ON21        | 5'-CCTCCATGCCGATTAGGCTA   | $\beta$ -actin, 20-mer                   |
| ON22        | 5'-CAATCCGTGATATTGGACAGC  | <i>RBR1</i> , 21-mer                     |
| ON23        | 5'-CTKGAYTTYWTYCGCGAGGTG  | <i>RBR1</i> , 21-mer, 32-fold degeneracy |
| ON24        | 5'-TCTCCTKSAGCWGMGCCTGCT  | <i>RBR1</i> , 21-mer, 16-fold degeneracy |

|      |                             |                                          |
|------|-----------------------------|------------------------------------------|
| ON25 | 5'-GCTYYTGAGYKCSTTTCCCGA    | <i>RBR1</i> , 21-mer, 32-fold degeneracy |
| ON26 | 5'-TGSSYRAGGCAGTCYGGAAG     | <i>RBR1</i> , 20-mer, 32-fold degeneracy |
| ON27 | 5'-TGCTGGAGGGCCTKGTSAC      | <i>RBR1</i> , 19-mer, 4-fold degeneracy  |
| ON28 | 5'-GASTGCATGTGCCSYGGYG      | <i>RBR1</i> , 19-mer, 16-fold degeneracy |
| ON29 | 5'-GAGTTCYTGTYACRGACTTCAC   | <i>RBR1</i> , 23-mer, 16-fold degeneracy |
| ON30 | 5'-AGCCAYGCRGACGYGCYCATT    | <i>RBR1</i> , 21-mer, 16-fold degeneracy |
| ON31 | 5'-TTCTAYAAAYCGSCACATCGACCA | <i>RBR1</i> , 23-mer, 8-fold degeneracy  |
| ON32 | 5'-GCYTGMGGCTGCTTGCGGTA     | <i>RBR1</i> , 20-mer, 4-fold degeneracy  |
| ON33 | 5'-TACCGCAAGCAGCCKCARGC     | <i>RBR1</i> , 20-mer, 4-fold degeneracy  |
| ON34 | 5'-TCRAYSACGACCGARCGGAA     | <i>RBR1</i> , 20-mer, 16-fold degeneracy |
| ON35 | 5'-GAGCAGGATGAAGAGGTCAAAC   | <i>RBR1</i> , 22-mer                     |
| ON36 | 5'-AGCCAGCACGCTGTTCATC      | <i>RBR1</i> , 19-mer                     |
| ON37 | 5'-CAAAAACCATAAAGTGCCGAGAGG | <i>RBR1</i> , 24-mer                     |

---

**Supplemental Table 3.** Comparison of a Subset of Sex-Related and Sex-Unrelated Proteins of *C. reinhardtii* with the Corresponding Putative Orthologs of *V. carteri*.

| <i>C. reinhardtii</i> protein                                       | Putative orthologous protein in <i>V. carteri</i>                                         | Percent identity<br>(Number of identical amino acid residues / total number of residues) | Percent similarity<br>(Number of similar amino acid residues / total number of residues) | Sex-related? |
|---------------------------------------------------------------------|-------------------------------------------------------------------------------------------|------------------------------------------------------------------------------------------|------------------------------------------------------------------------------------------|--------------|
| Retinoblastoma-related protein MAT3<br>(Acc. No. AF375824)          | Retinoblastoma-related protein RBR1<br>(Acc. No. EF123087)                                | 45.99%<br>(566/1231)                                                                     | 61.10%<br>(752/1231)                                                                     | Yes          |
| Plus mating structure glycoprotein FUS1<br>(Acc. No. U49864)        | ---                                                                                       | ---                                                                                      | ---                                                                                      | Yes          |
| Minus dominance protein MID<br>(Acc. No. U92071)                    | (no significant putative ortholog)                                                        |                                                                                          |                                                                                          |              |
|                                                                     | Putative transcription factor with RWP-RK motif<br>( <i>V. carteri</i> protein ID 127314) | 34.21%<br>(26/76)                                                                        | 76.31%<br>(58/76)                                                                        | Yes          |
| Minus agglutinin SAD1<br>(Acc. No. AY450929)                        | Putative forkhead transcription factor<br>( <i>V. carteri</i> protein ID 94393)           | 17.45%<br>(493/2826)                                                                     | 25.30%<br>(715/2826)                                                                     | Yes          |
| Small G-protein YPTC1/RABD1<br>(Acc. No. U13168)                    | Small G-protein YptV1<br>(Acc. No. M93438)                                                | 95.10%<br>(193/203)                                                                      | 99.00%<br>(201/203)                                                                      | No           |
| $\beta$ 1-Tubulin<br>(Acc. No. M10064)                              | $\beta$ 1-Tubulin<br>(Acc. No. X12855)                                                    | 99.70%<br>(442/443)                                                                      | 99.70%<br>(442/443)                                                                      | No           |
| Actin<br>(Acc. No. D50838)                                          | Actin<br>(Acc. No. M33963)                                                                | 98.10%<br>(370/377)                                                                      | 99.50%<br>(375/377)                                                                      | No           |
| Nitrate reductase NIT1<br>(Acc. No. XM_001696645)                   | Nitrate reductase NitA<br>(Acc. No. X64136)                                               | 80.70%<br>(697/864)                                                                      | 95.90%<br>(829/864)                                                                      | No           |
| Oxygen-evolving enhancer protein 1, PSBO<br>(Acc. No. XM_001694647) | Oxygen-evolving enhancer protein 1, PsbO<br>(Acc. No. AF110780)                           | 88.00%<br>(257/292)                                                                      | 96.90%<br>(283/292)                                                                      | No           |
| Light harvesting protein LHCA9<br>(Acc. No. XM_001692496)           | Light harvesting protein Lhca<br>(Acc. No. AF110787)                                      | 87.80%<br>(187/213)                                                                      | 97.60%<br>(208/213)                                                                      | No           |
| Bi-ubiquitin UBQ1a<br>(Acc. No. XM_001701327)                       | Polyubiquitin UbiA<br>(Acc. No. X74214)                                                   | 100.00%<br>(152/152)                                                                     | 100.00%<br>(152/152)                                                                     | No           |
